# Supplementary material for: Los señores del agua: ; El mensaje enterrado
Source: Royal Society of Chemistry journal article supplement (doi:10.1039/c5cp07716h), 2003-01-01
Supplement: c5cp07716h1.pdf [file c5cp07716h1.pdf]

## Electronic Supporting Information

### Steric Hindrance Inhibits Excited-State Relaxation and Lowers the Extent of Intramolecular Charge Transfer in Two-Photon Absorbing Dyes

*David J. Stewart,<sup>\*a,b</sup> Matthew J. Dalton,<sup>a</sup> Stephanie L. Long,<sup>a,c</sup> Ramamurthi Kannan,<sup>a,d</sup> Zhenning Yu,<sup>a,d</sup> Thomas M. Cooper,<sup>a</sup> Joy E. Haley,<sup>\*a</sup> and Loon-Seng Tan<sup>a</sup>*

<sup>a</sup>Air Force Research Laboratory, Materials and Manufacturing Directorate, Functional Materials Division, Wright-Patterson AFB, Ohio 45433-7750, United States

<sup>b</sup>General Dynamics Information Technology, 5100 Springfield Pike, Dayton, Ohio 45431, United States

<sup>c</sup>Southwestern Ohio Council for Higher Education, Dayton, Ohio 45420, United States

<sup>d</sup>UES, Inc., 4401 Dayton-Xenia Road, Dayton, Ohio 45432, United States

\*david.stewart.32.ctr@us.af.mil; joy.haley.1@us.af.mil

|                          |    |
|--------------------------|----|
| <b>Table of Contents</b> | S1 |
| <b>List of Figures</b>   | S2 |
| <b>Figures</b>           | S3 |

### **List of Figures and Tables**

|                                                                                                                                             |    |
|---------------------------------------------------------------------------------------------------------------------------------------------|----|
| <b>Figure S1.</b> Absorption spectra of <b>1-4</b> in n-hexane (black), benzene (red), THF (green), acetone (blue), and acetonitrile (pink) | S3 |
| <b>Figure S2.</b> Emission spectra of <b>1-4</b> in n-hexane (black), benzene (red), THF (green), acetone (blue), and acetonitrile (pink)   | S3 |
| <b>Figure S3.</b> Femtosecond transient absorption difference spectra of <b>1</b> in various solvents at time zero (top) and 10 ps (bottom) | S4 |
| <b>Figure S4.</b> Femtosecond transient absorption difference spectra of <b>2</b> in various solvents at time zero (top) and 10 ps (bottom) | S4 |
| <b>Figure S5.</b> Femtosecond transient absorption difference spectra of <b>3</b> in various solvents at time zero (top) and 10 ps (bottom) | S5 |
| <b>Figure S6.</b> Femtosecond transient absorption difference spectra of <b>4</b> in various solvents at time zero (top) and 10 ps (bottom) | S5 |

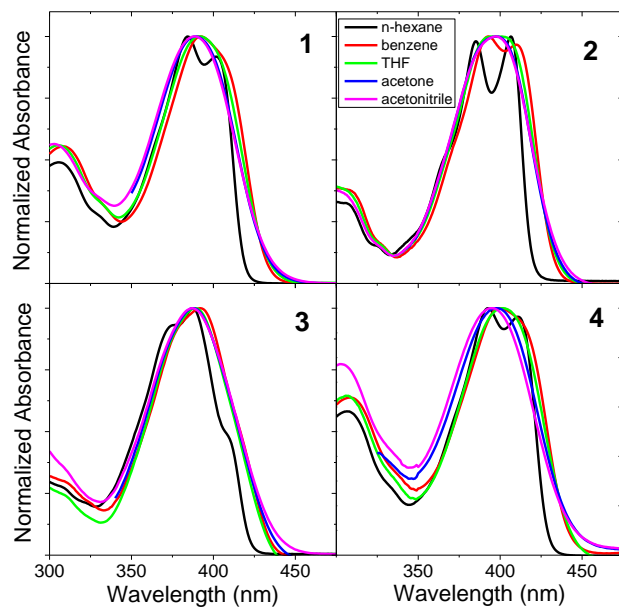

**Figure S1.** Absorption spectra of **1-4** in n-hexane (black), benzene (red), THF (green), acetone (blue), and acetonitrile (pink)

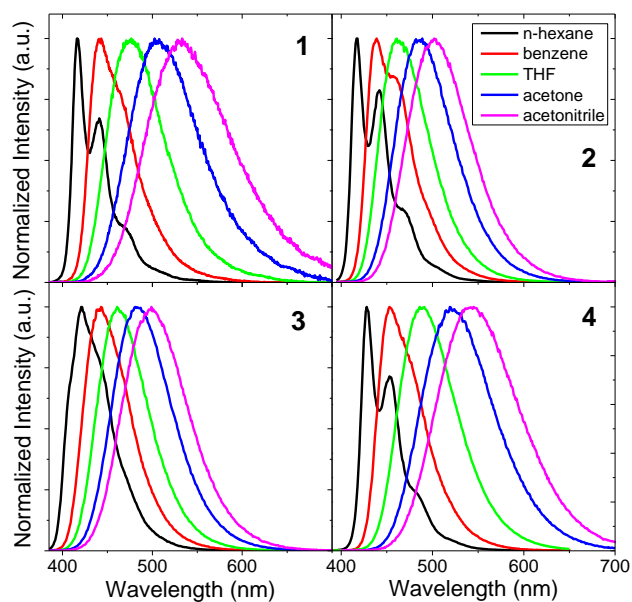

**Figure S2.** Emission spectra of **1-4** in n-hexane (black), benzene (red), THF (green), acetone (blue), and acetonitrile (pink)

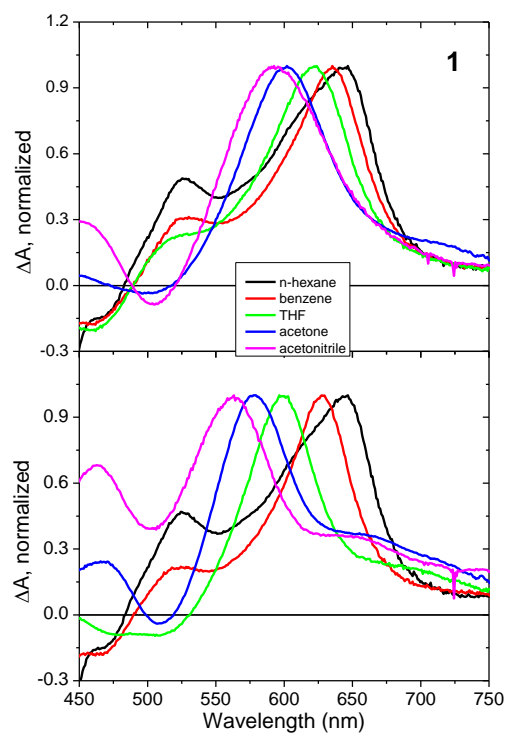

**Figure S3.** Femtosecond transient absorption difference spectra of **1** in various solvents at time zero (top) and 10 ps (bottom)

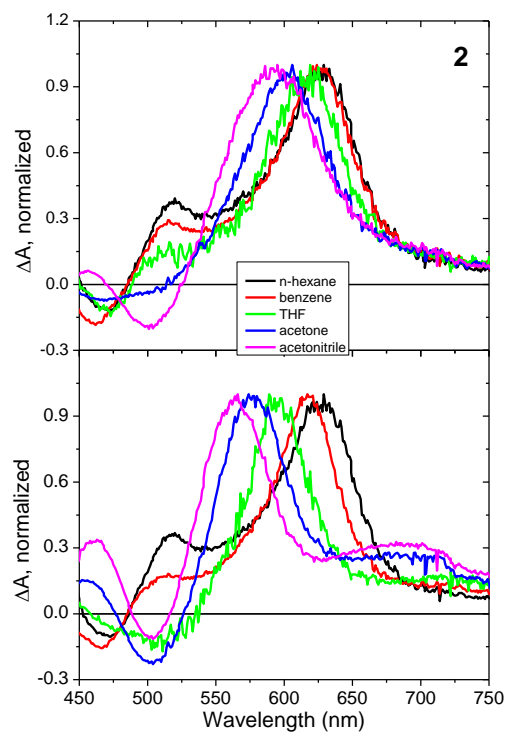

**Figure S4.** Femtosecond transient absorption difference spectra of **2** in various solvents at time zero (top) and 10 ps (bottom)

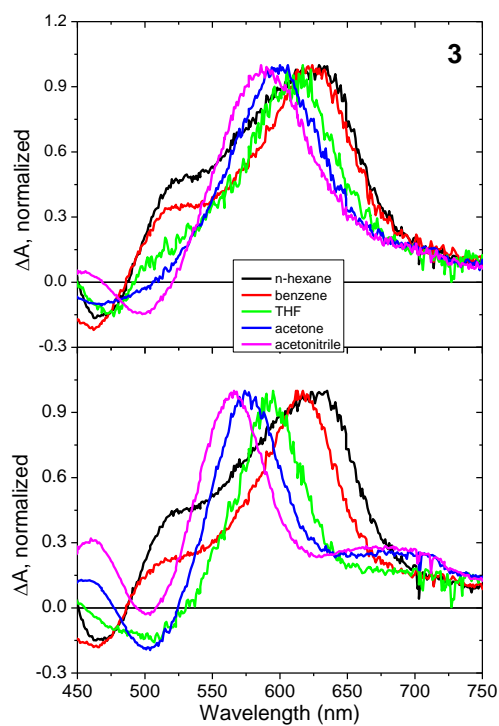

**Figure S5.** Femtosecond transient absorption difference spectra of **3** in various solvents at time zero (top) and 10 ps (bottom)

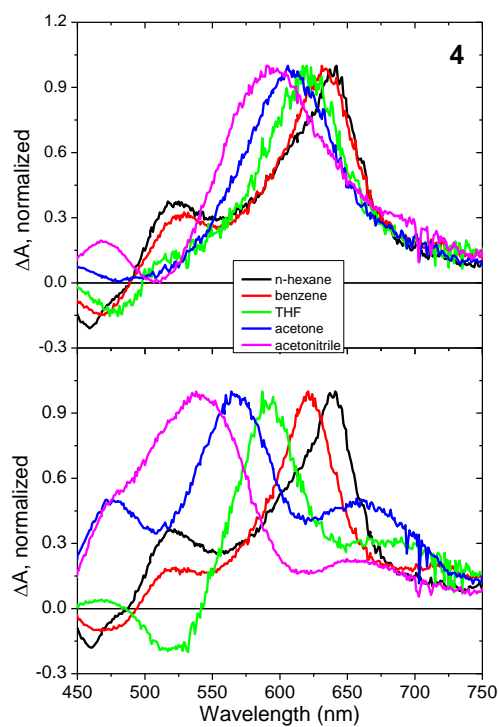

**Figure S6.** Femtosecond transient absorption difference spectra of **4** in various solvents at time zero (top) and 10 ps (bottom)
